# Supplementary material for: Accumulation of Dystrophin-Positive Muscle Fibers and Improvement of Neuromuscular Junctions in mdx Mouse Muscles after Bone Marrow Transplantation under Different Conditions
Source: MDPI journal article supplement (doi:10.3390/ijms24108892), 2023-05-17
Supplement: s1 [file s1]

Supplementary.

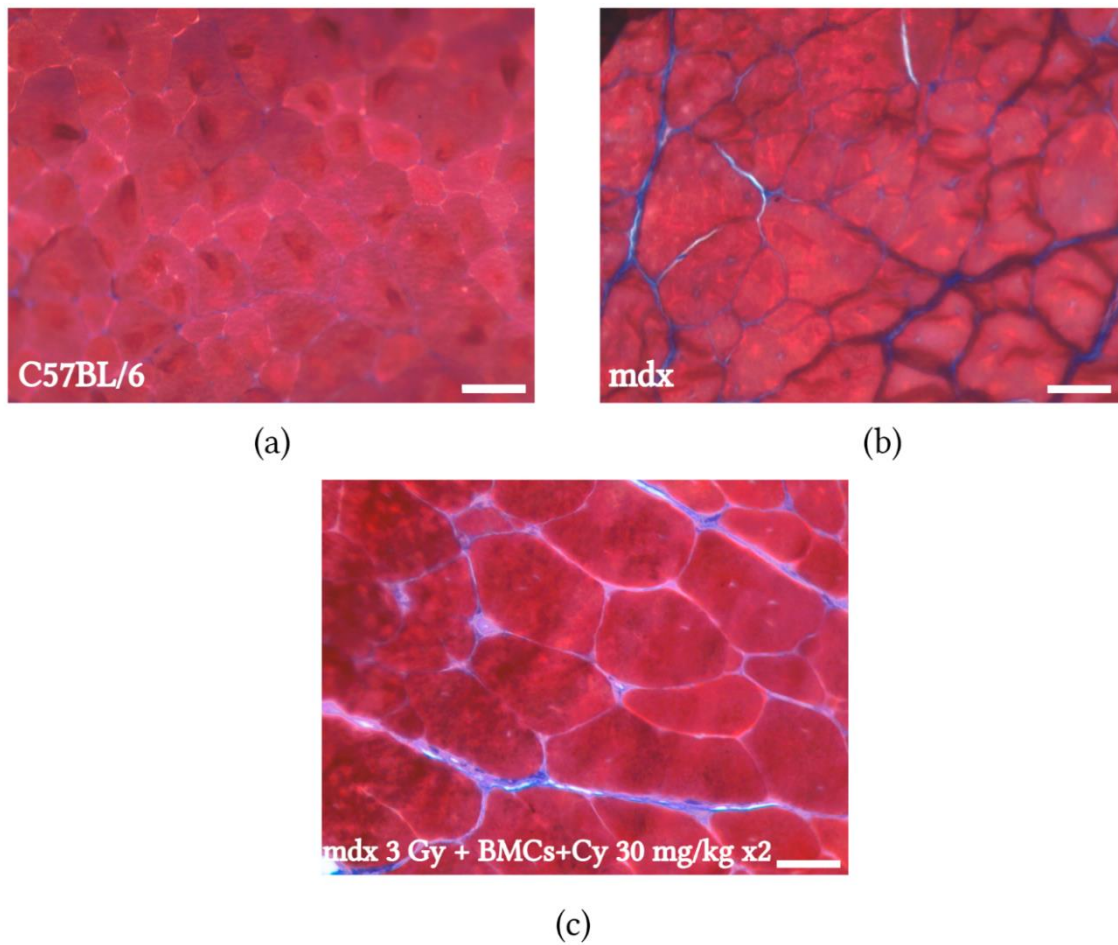

**Figure S1.** The fibrosis level evaluation in the quadriceps femoris after BMC transplantation. (a) Masson's trichrome staining of the quadriceps femoris of normal *C57BL/6* mice; scale bar 50 μm; (b) Masson's trichrome staining of the quadriceps femoris of *mdx* mice; fibrosis (blue); scale bar 50 μm; and (c) Masson's trichrome staining of the quadriceps femoris of *mdx* mice after BMCs transplantation; the decreasing part of fibrosis in muscle (blue); scale bar 50 μm.

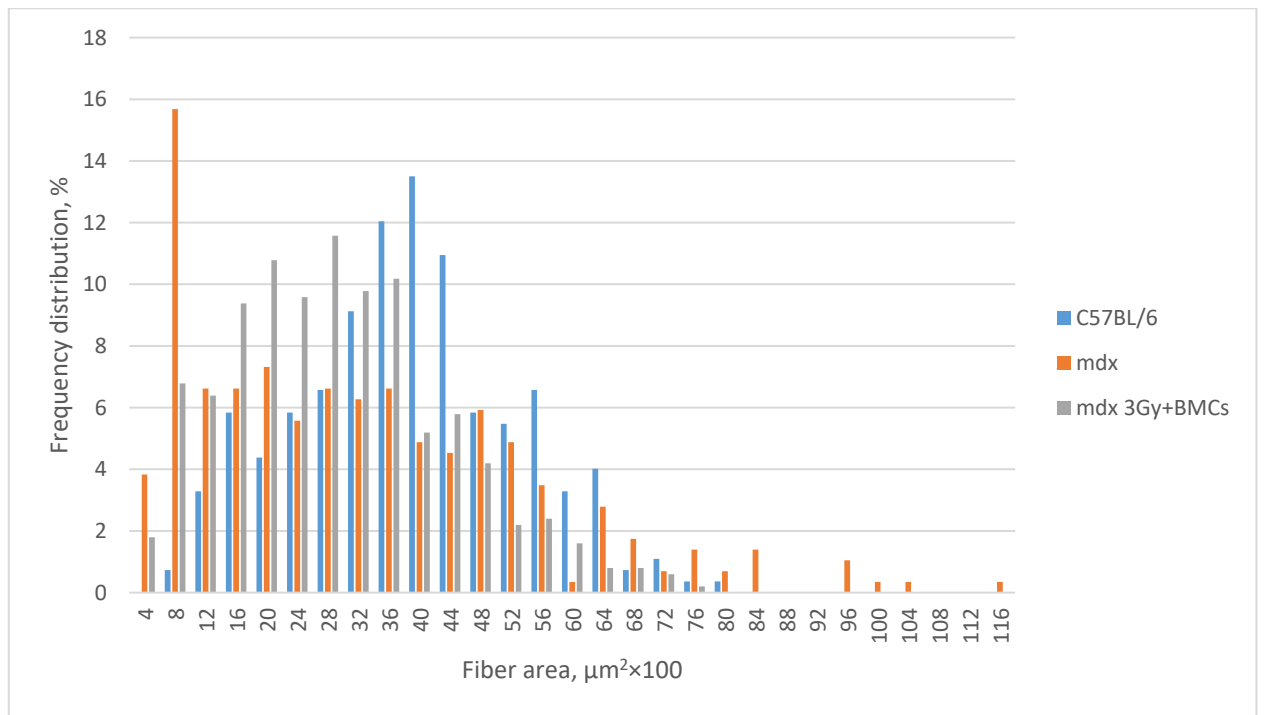

**Figure S2.** The muscle fiber cross sectional area frequency distribution.

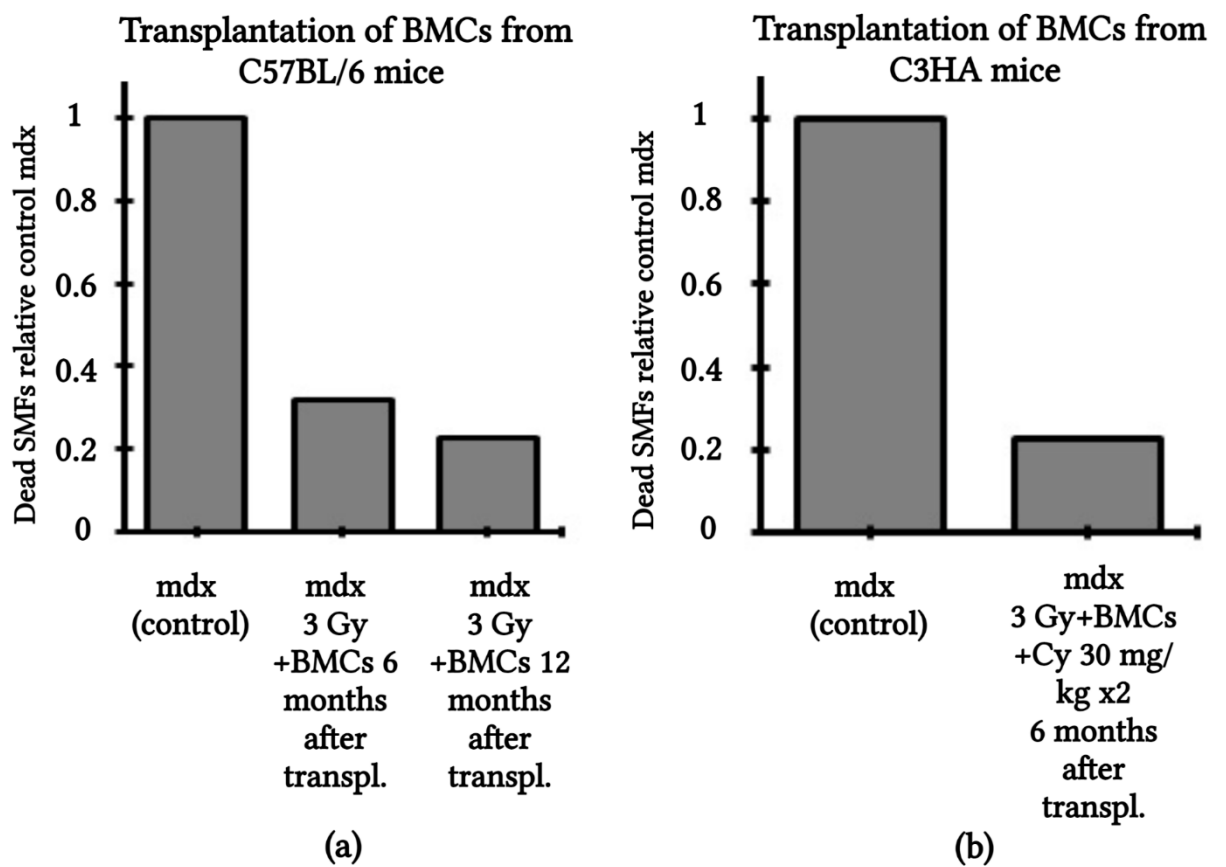

**Figure S3.** Reduction in the number of dead SMFs after BMC transplantation. (a) Decrease in the number of dead SMFs after BMC transplantation from C57BL/6 mice; (b) Decrease in the number of dead SMFs after BMC transplantation from C3HA mice.

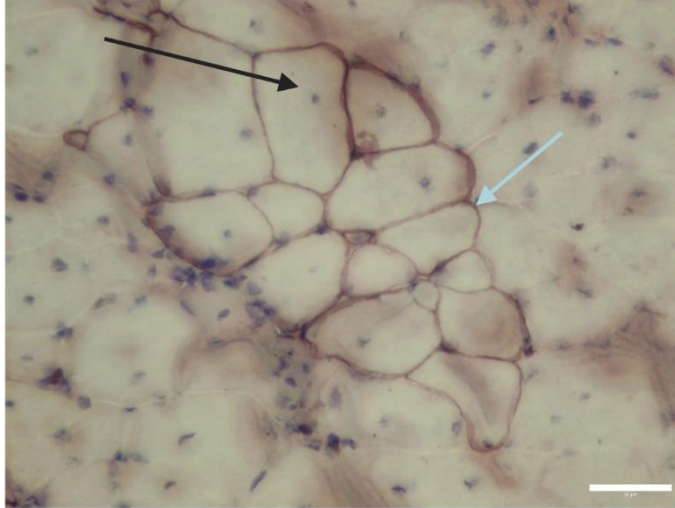

**Figure S4.** Immunohistochemical staining of SMFs from the quadriceps femoris of *mdx* mice after C3HA BMC transplantation; focus of dystrophin-positive SMFs were observed. Dystrophin-positive SMFs with (black arrow) and without (blue arrow) centrally located nuclei; scale bar 50 μm.
